# Supplementary material for: Thrombus migration in patients with acute ischaemic stroke undergoing endovascular thrombectomy
Source: HighWire-hosted journal article supplement (doi:10.1136/svn-2022-002257), 2023-06-08
Supplement: svn-2022-002257supp001_data_supplement.pdf [file svn-2022-002257supp001_data_supplement.pdf]

### Supplemental files

Supplemental table 1 Comparison of reocclusion between TM and Non-TM group

|         | Reocclusion (n,%) | Non-reocclusion (n,%) | P     |
|---------|-------------------|-----------------------|-------|
| TM      | 1 (1.41%)         | 70 (98.59%)           | 1.000 |
| None-TM | 11 (1.98%)        | 545 (98.02%)          |       |

Supplemental table 2 Comparison of tandem occlusion between TM and None-TM group

|         | Tandem (case,%) | Non-tandem (n, %) | P     |
|---------|-----------------|-------------------|-------|
| TM      | 11 (15.49%)     | 60 (84.51%)       | 0.082 |
| None-TM | 50 (8.99%)      | 506 (91.01%)      |       |

Supplemental table 3 Comparison of final successful revascularization rates in the DTM and non-DTM group

|                | DTM (n, %)     | Non-DTM (n, %)   | P      |
|----------------|----------------|------------------|--------|
| TICI3          | 8/53 (15.09%)  | 190/571 (33.27%) | 0.0065 |
| TICI $\geq$ 2b | 27/53 (50.94%) | 458/571 (80.21%) | <0.001 |

Supplement table4 Comparison of outcomes between TM and Non-TM group

|                          | TM         | No-TM       | P value | Adjusted OR       |
|--------------------------|------------|-------------|---------|-------------------|
| MRS of 0 or 1 at 90 days |            |             |         |                   |
| 0-1                      | 21(30.88)  | 123(22.16)  | 0.1074  | 1.262(0.69,2.311) |
| 2-6                      | 47(69.12)  | 432(77.84)  |         |                   |
| 合计                       | 68(100.00) | 555(100.00) |         |                   |
| MRS of 0-2 at 90 days    |            |             |         |                   |
| 0-2                      | 33(48.53)  | 194(34.95)  | 0.0281  | 1.360(0.767,2.41) |
| 3-6                      | 35(51.47)  | 361(65.05)  |         |                   |
| 合计                       | 68(100.00) | 555(100.00) |         |                   |

|                                 | TM         | No-TM       | P value | Adjusted OR        |
|---------------------------------|------------|-------------|---------|--------------------|
| <b>death</b>                    |            |             |         |                    |
| yes                             | 10(14.71)  | 105(18.88)  | 0.4015  | 1.085(0.513,2.294) |
| no                              | 58(85.29)  | 451(81.12)  |         |                    |
| sum                             | 68(100.00) | 556(100.00) |         |                    |
| <b>SNI at day7 or discharge</b> |            |             |         |                    |
| yes                             | 39(57.35)  | 302(54.32)  | 0.6350  | 1.181(0.575,2.429) |
| no                              | 29(42.65)  | 254(45.68)  |         |                    |
| sum                             | 68(100.00) | 556(100.00) |         |                    |
| <b>eTICI on final angiogram</b> |            |             |         |                    |
| ≥2b                             | 57(85.07)  | 446(81.54)  | 0.4774  | 0.961(0.559,1.652) |
| < 2b                            | 10(14.93)  | 101(18.46)  |         |                    |
| sum                             | 67(100.00) | 547(100.00) |         |                    |

Values were adjusted for age, atrial fibrillation, treatment with rtPA, baseline NIHSS score, time from onset to groin puncture, and occlusion site. NIHSS, National Institutes of Health Stroke Scale; IVT, intravenous thrombolysis; TM, thrombus migration.
